# Supplementary material
Source: publisher site journal article supplement (https://www.dovepress.com/get_supplementary_file.php?f=456593.docx)
Supplement: Supplementary file 1 [file get_supplementary_file.php]

Figure Supplementary 1

hdWGCNA Dendrogram indicating four modules labeled as M1, M2, M3, and M4, each marked with different colors, derived from the E1 cell subpopulation.

Figure Supplementary 2

Spearman correlation analysis between the remaining eight DEGs of SSc skin and the EndMT pathway, with a correlation coefficient (cor) < 0.5.

S3


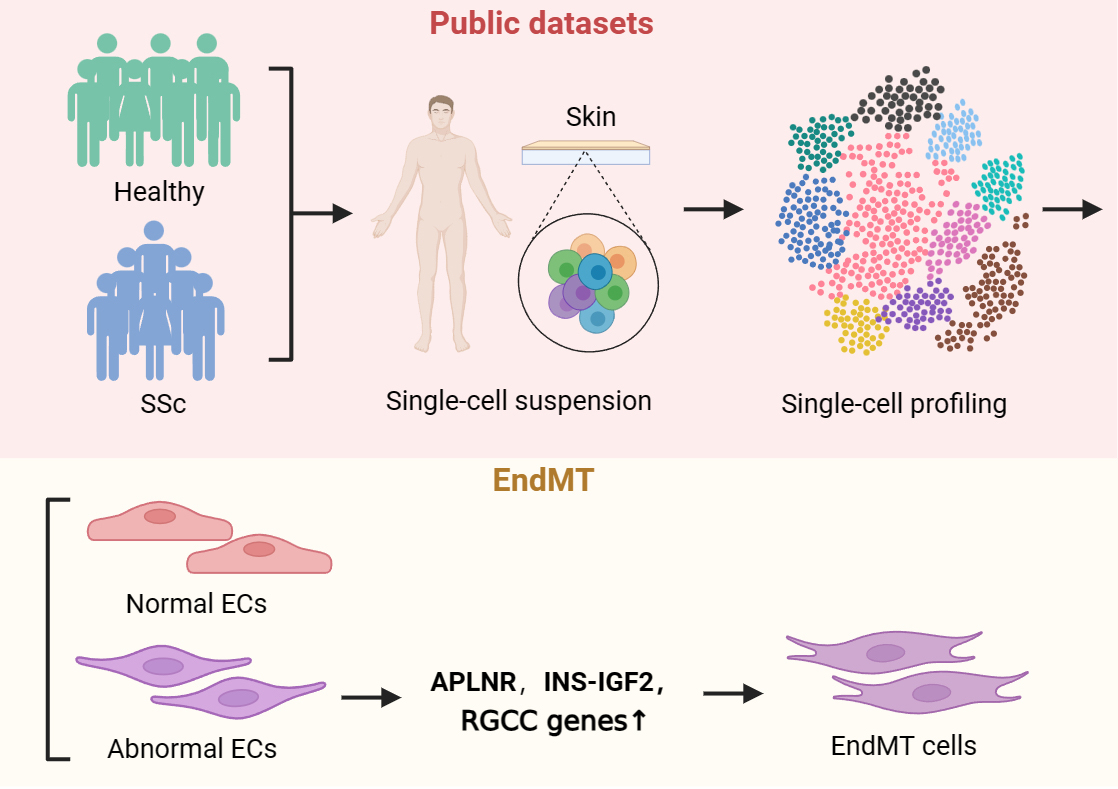


Figure Supplementary 3

The sequencing flow chart and key findings of this study
